# Supplementary material for: High-throughput screening of the effects of 90 xenobiotics on the simplified human gut microbiota model (SIHUMIx): a metaproteomic and metabolomic study
Source: Frontiers journal article supplement (doi:10.3389/fmicb.2024.1349367), 2024-02-19

**Figure S1: Concentration of sulfasalazine over the course of seven days during the screening process.** Biotic samples comprised SIHUMIx exposed to 1μM sulfasalazine for 24 hours, while abiotic samples consisted of CIM media and 1μM sulfasalazine.

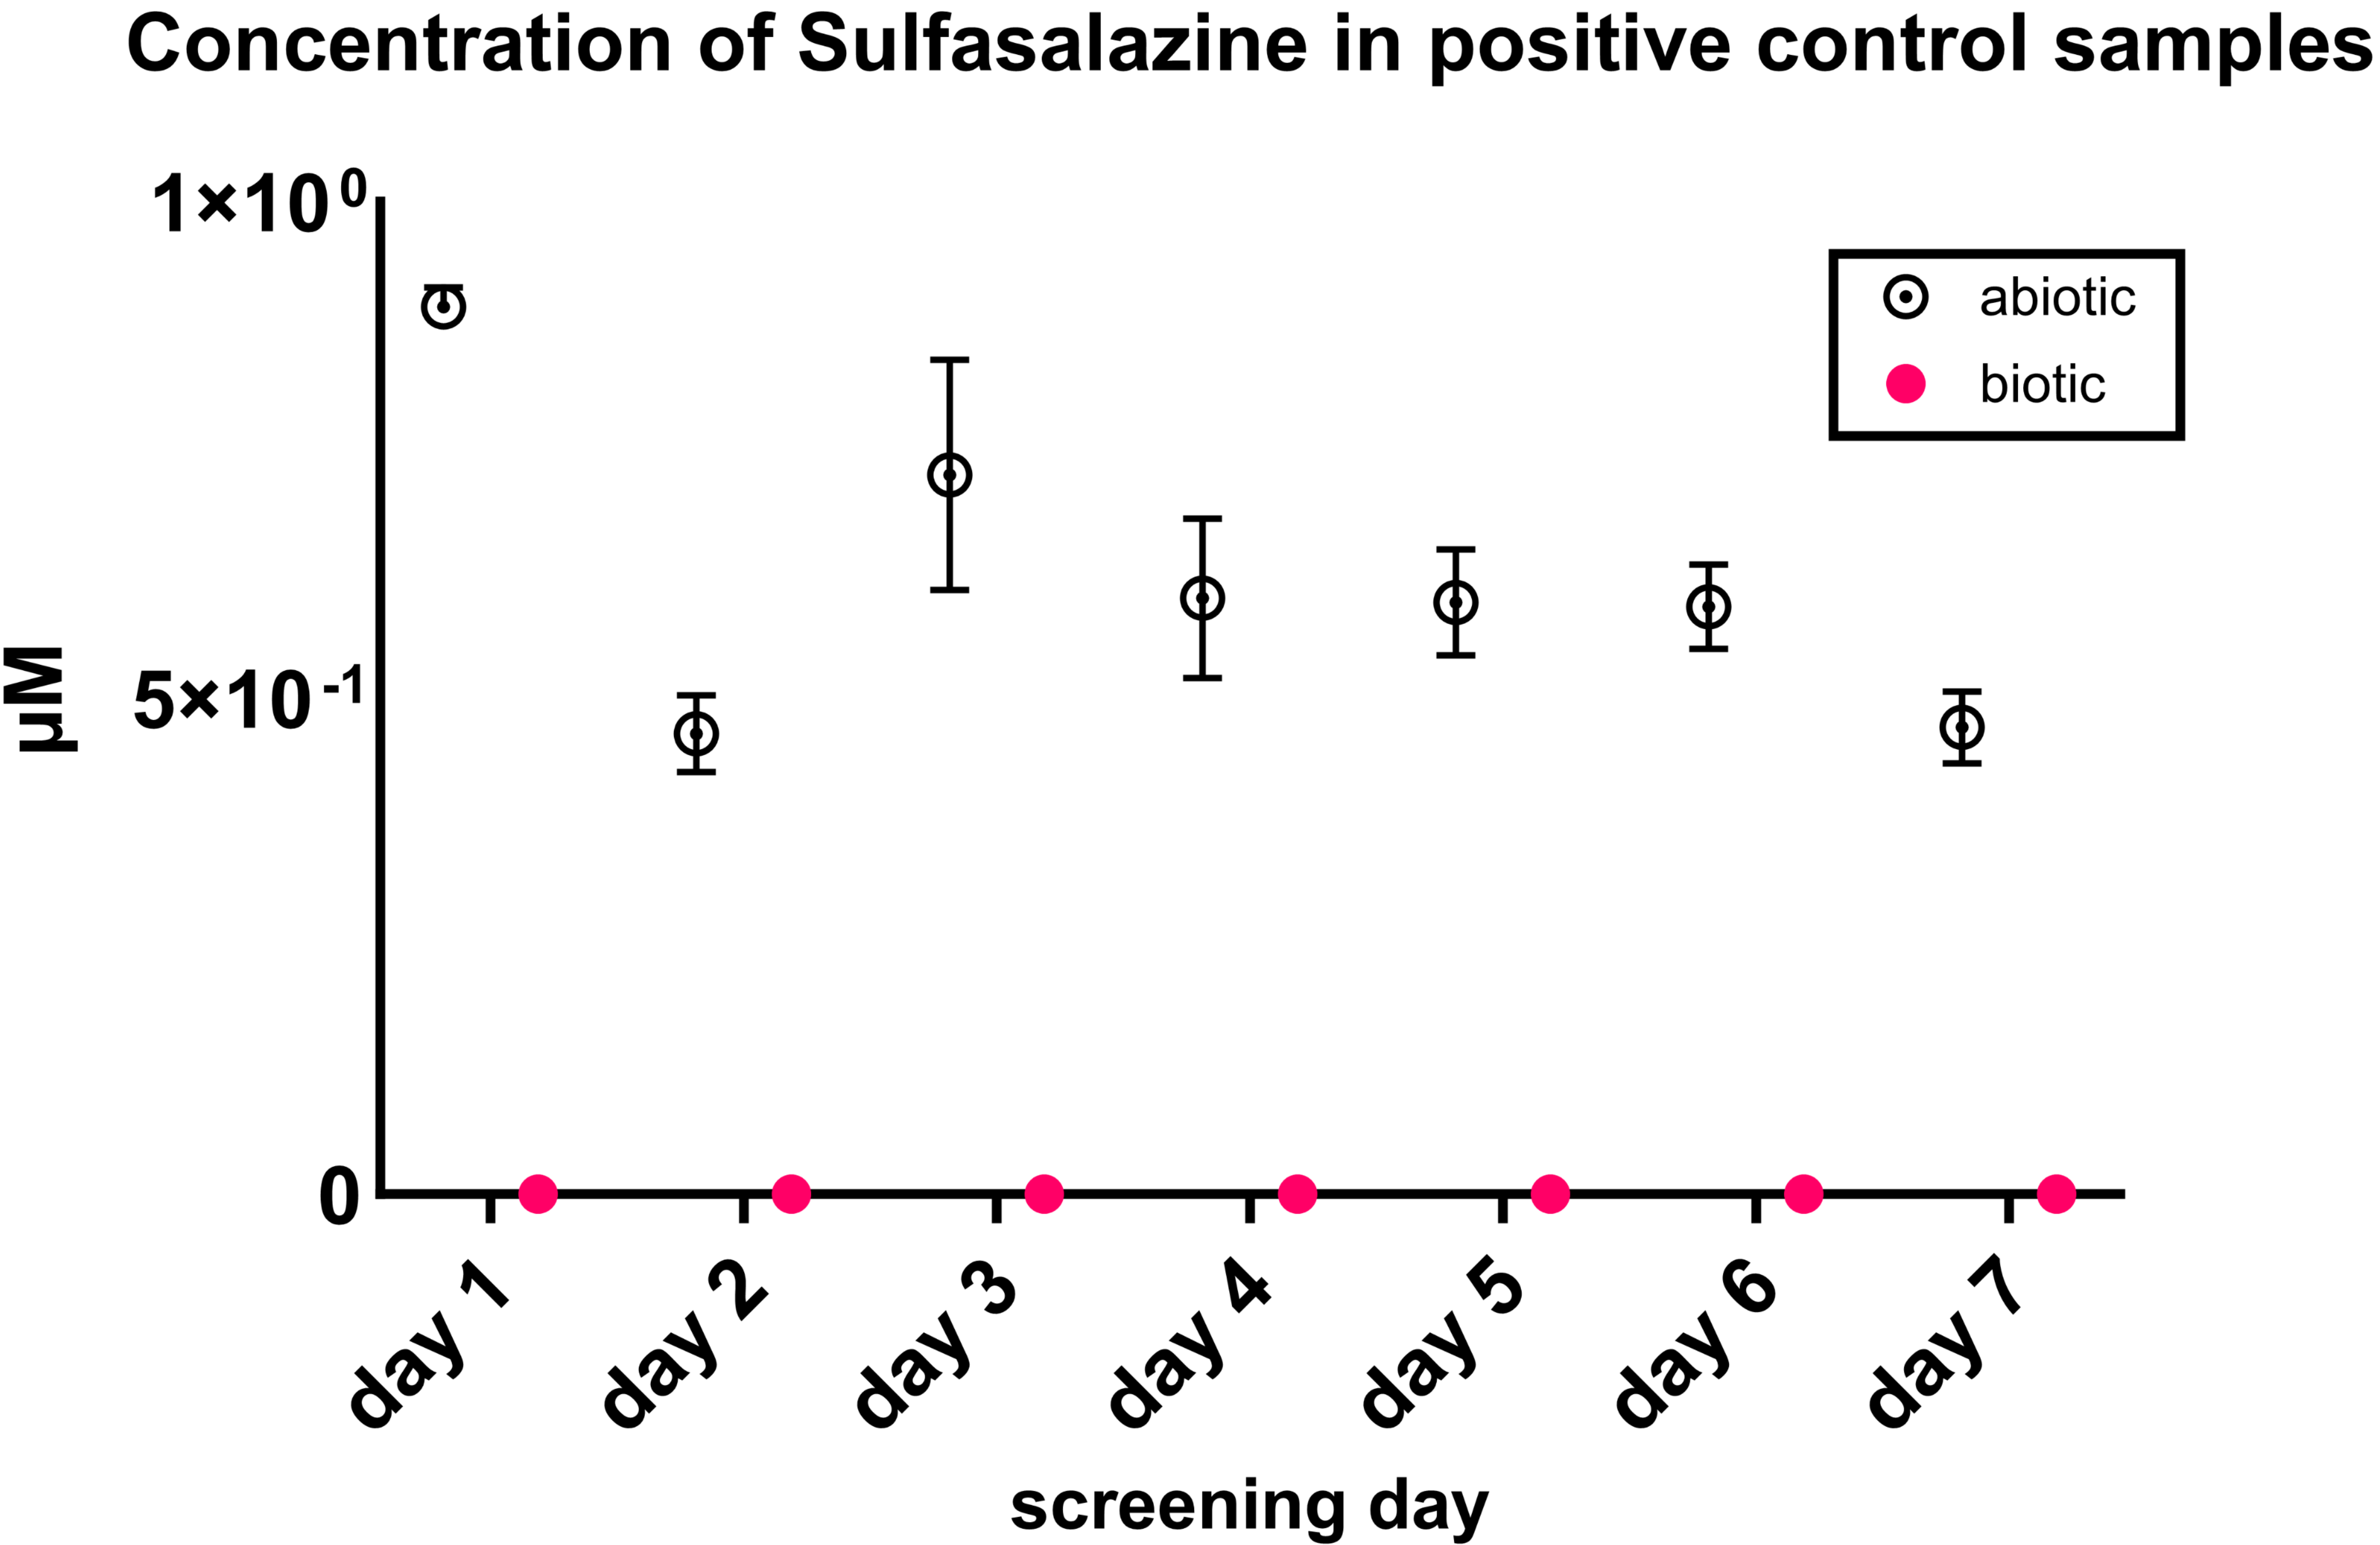

Supplement: Image_1.pdf [file Image_1.pdf]
