# Supplementary material for: High-throughput screening of the effects of 90 xenobiotics on the simplified human gut microbiota model (SIHUMIx): a metaproteomic and metabolomic study
Source: Frontiers journal article supplement (doi:10.3389/fmicb.2024.1349367), 2024-02-19

**Figure S3: Relative abundances of SCFAs after the exposure of SIHUMIx to food additives and dyes:** High abundance (left side) and low abundance (right side) SCFAs after exposure to (A) butylated hydroxyanisole, sorbic acid and saccharine, (B) tartaric acid, citric acid and ascorbic acid, (C) cochineal, red 4, sunset yellow, acid red 14, acid orange 7, blue 1 and allura red, (D) maltitol, sorbitol and stevia.

A

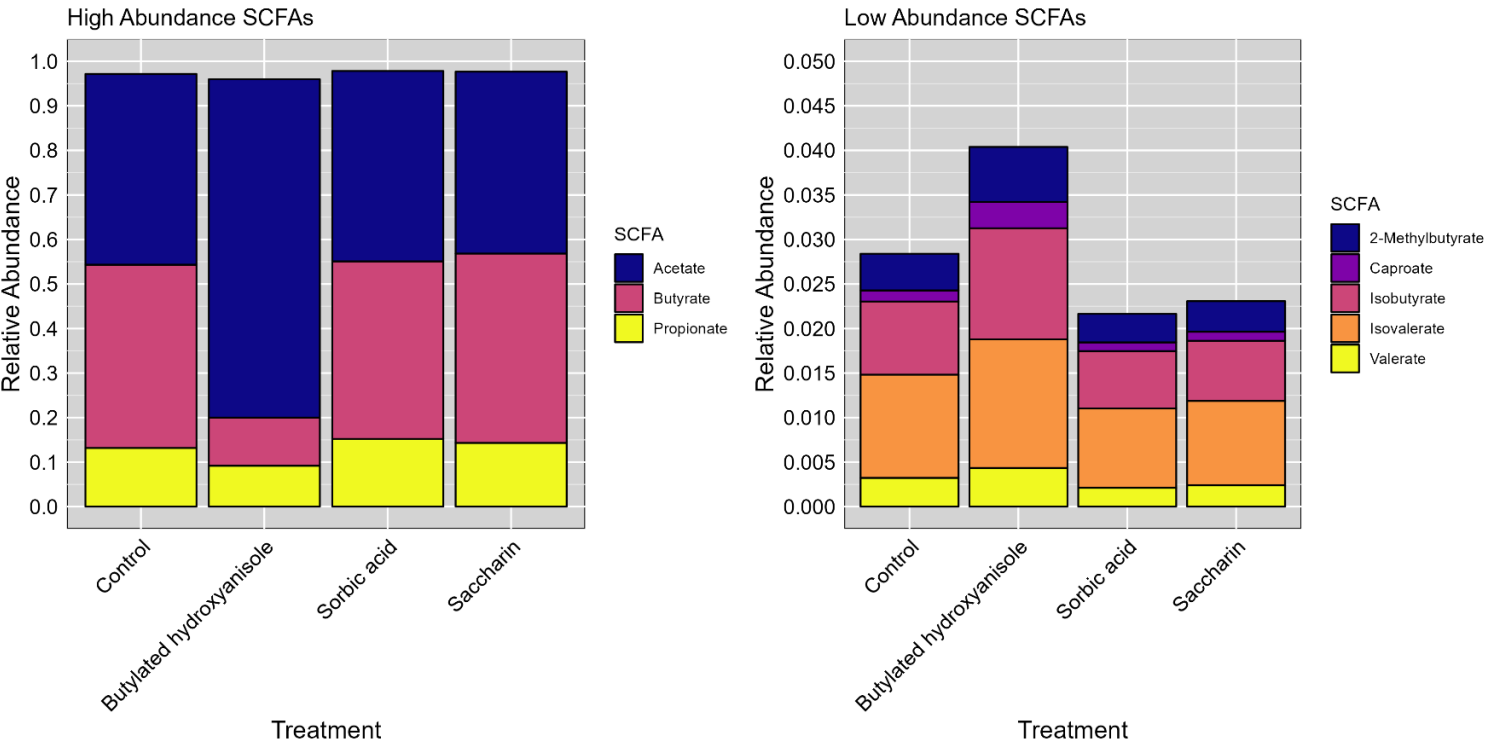

B

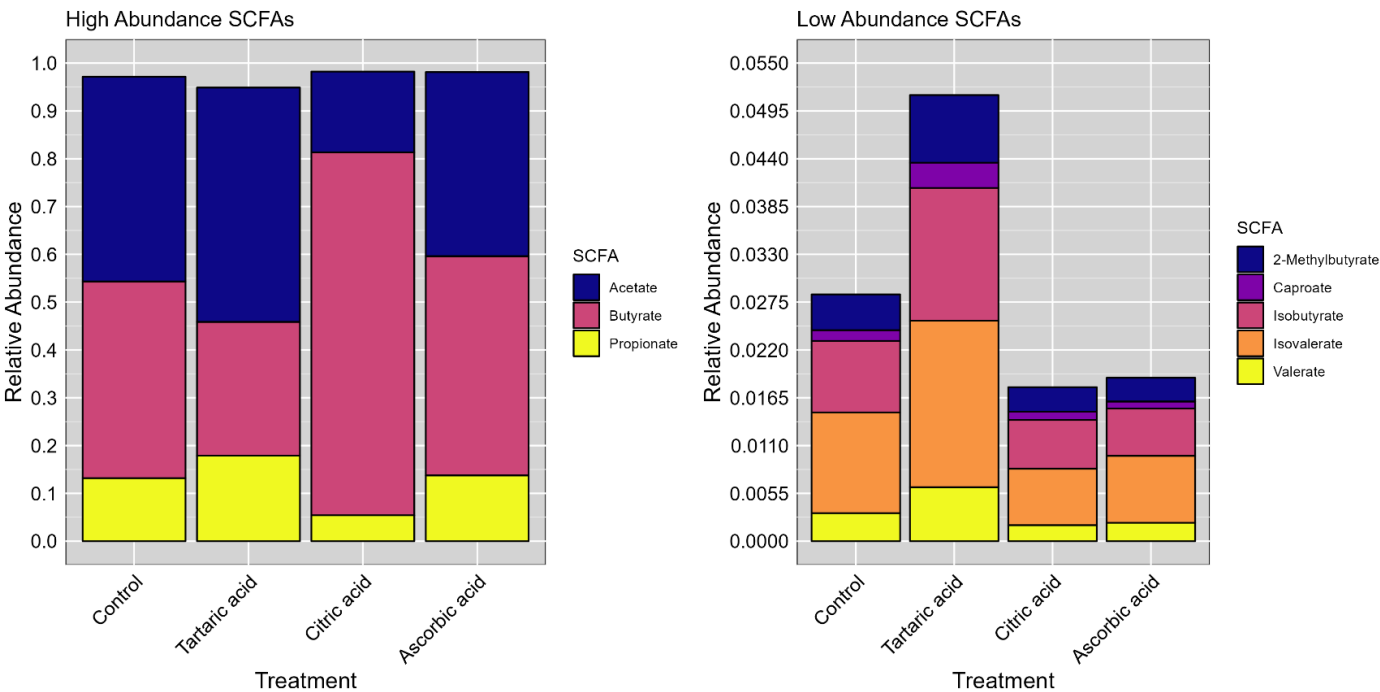



C

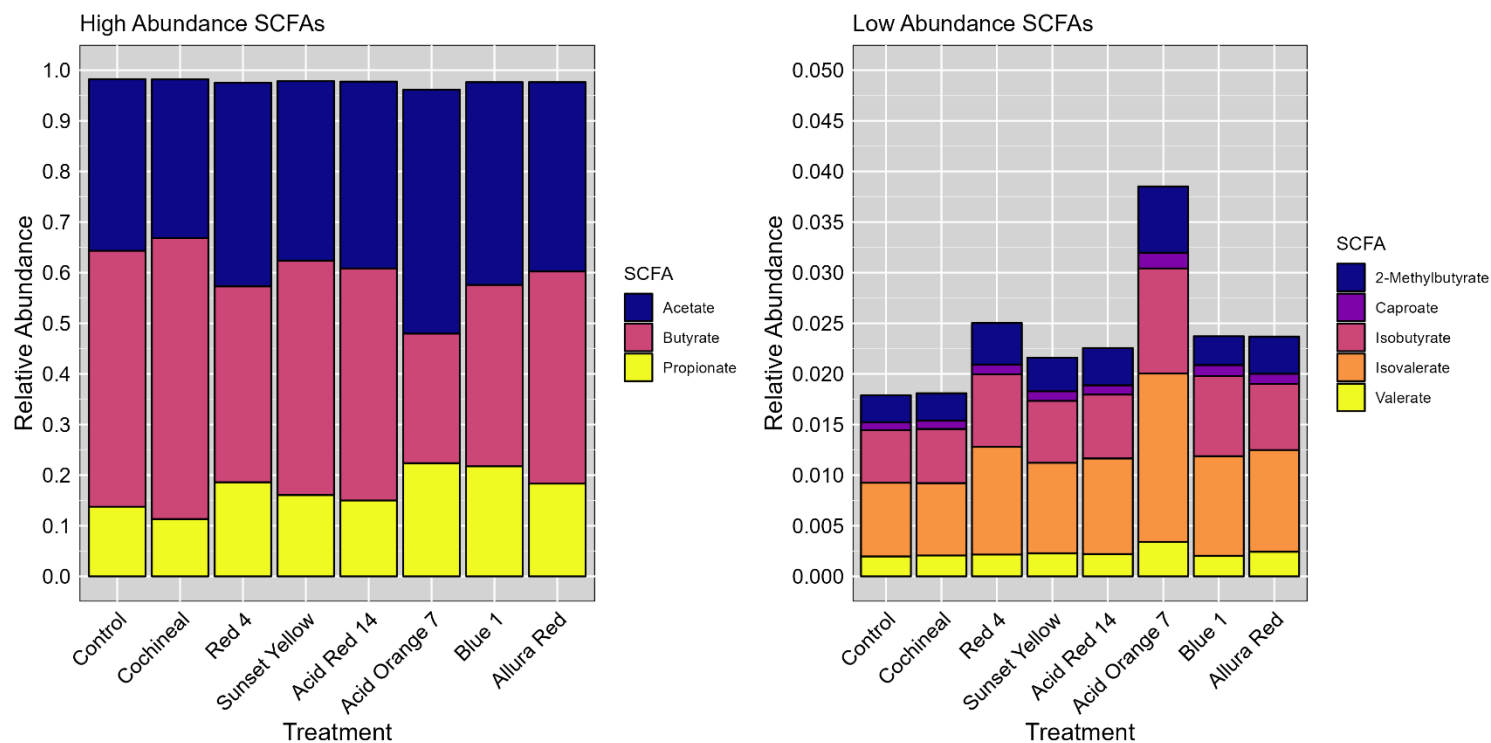

D

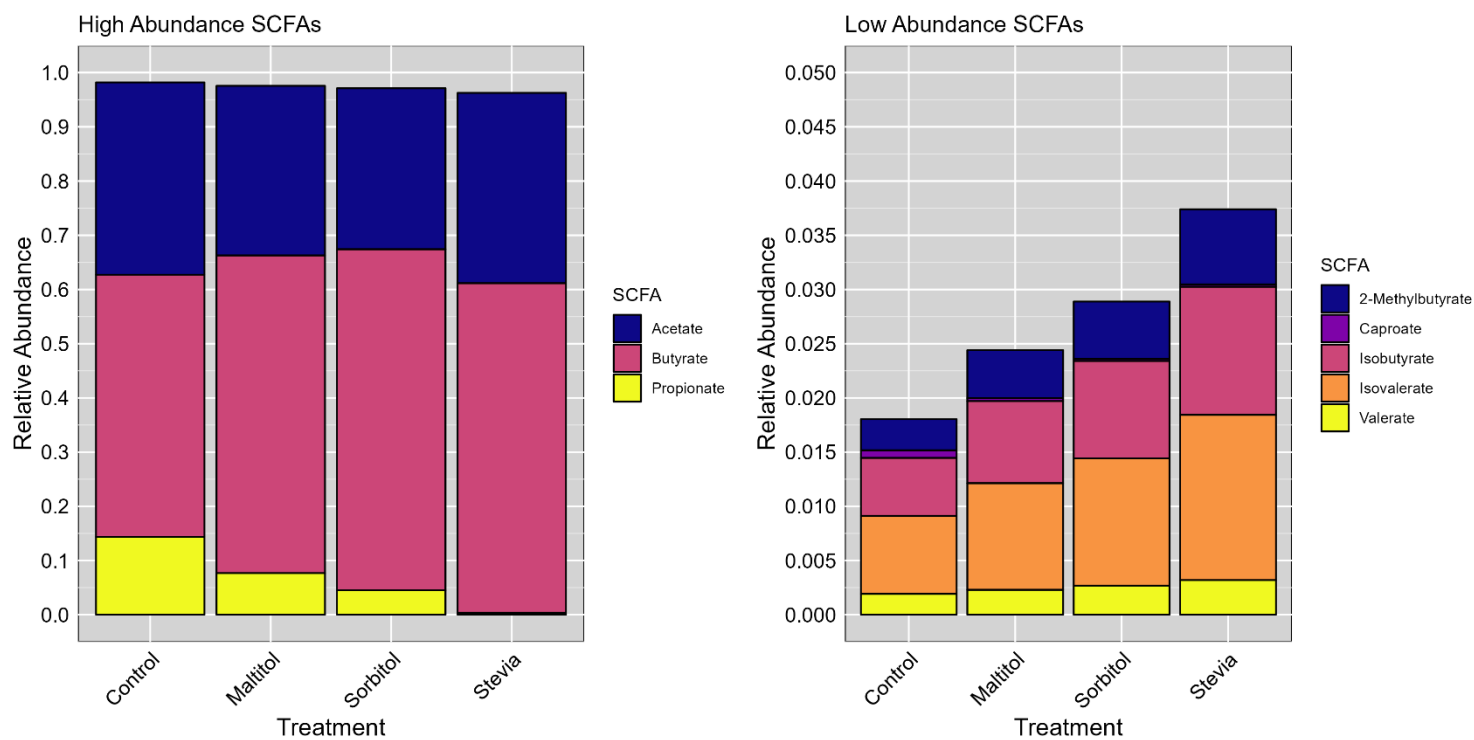

Supplement: Image_3.pdf [file Image_3.pdf]
