# Supplementary material for: High-throughput screening of the effects of 90 xenobiotics on the simplified human gut microbiota model (SIHUMIx): a metaproteomic and metabolomic study
Source: Frontiers journal article supplement (doi:10.3389/fmicb.2024.1349367), 2024-02-19

**Figure S4: Impact of plant protection products on the metabolic pathways of SIHUMIx.** The pathway intensity was measured by metaproteomics and is displayed as log<sub>2</sub>FC for plant protection products which affected at least the intensity of one pathway compared to the control. Statistically significant effects ( $P_{adj} < 0.05$ ) are highlighted by asterisks.

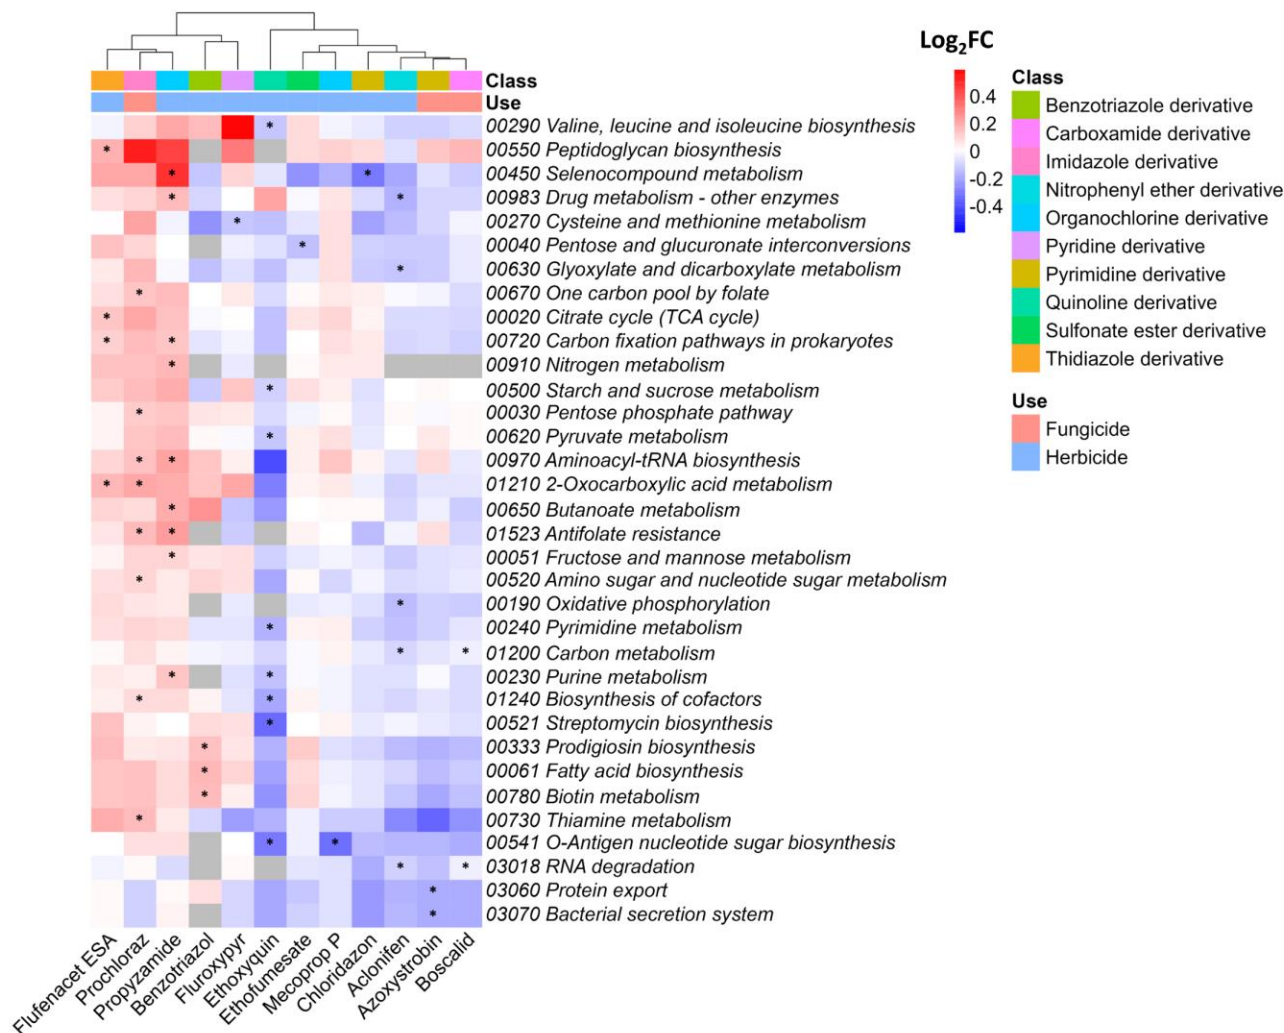

Supplement: Image_4.pdf [file Image_4.pdf]
