# Supplementary material for: High-throughput screening of the effects of 90 xenobiotics on the simplified human gut microbiota model (SIHUMIx): a metaproteomic and metabolomic study
Source: Front Microbiol. 2024 Feb 20;15:1349367. doi: 10.3389/fmicb.2024.1349367 (PMC10912515; doi:10.3389/fmicb.2024.1349367)
Supplement: Supplementary file 3 [file Table_3.xlsx]

## Sheet: Basic list
Table S3: Concentration of the 36 food additives and dyes used in the study: Technical information about each of the chemicals used in the experiment, including information about the maximum recommended value and its source and concentration for the experiment, SMILES identificators and CAS number
NAME	CAS	SMILES	Exposure Value	Max Exposure	Units	Source	Daily Exposure for average adult human (mg/day)	Screening concentration (mg/mL)	Solvent
Screening concentration defined by 0.5% Exposure Value
Butylated hydroxytoluene (BHT) (E-321)	128-37-0	CC1=CC(=C(C(=C1)C(C)(C)C)O)C(C)(C)C	ADI	0.25	mg/kg/bw/day	http://dx.doi.org/10.2903/j.efsa.2012.2588	17.5	0.0875	MeOH
Butylated hydroxyanisole (BHA) (E-320)	25013-16-5	COC1=CC=C(O)C(=C1)C(C)(C)C	ADI	1	mg/kg/bw/day	http://dx.doi.org/10.2903/j.efsa.2012.2759	70	0.35	MeOH
Saccharin (E-954)	81-07-2	O=C1NS(=O)(=O)c2ccccc12	ADI	3.8	mg/kg/bw/day	http://dx.doi.org/10.2903/j.efsa.2017.4722	266	0.2	MeOH
Tartaric acid (E-334)	526-83-0	C(C(C(=O)O)O)(C(=O)O)O	ADI	30	mg/kg/bw/day	http://dx.doi.org/10.2903/j.efsa.2003.19	2100	1.03	MilliQ Water
Citric acid (E-330)	77-92-9	OC(=O)CC(O)(CC(O)=O)C(O)=O	Max Dietary Exposure	2400	mg/day	https://efsa.onlinelibrary.wiley.com/doi/full/10.2903/j.efsa.2016.4599	2400	2.96	MilliQ Water
Ascorbic acid (E-300)	50-81-7	C(C(C1C(=C(C(=O)O1)O)O)O)O	AR	80	mg/day	http://dx.doi.org/10.2903/j.efsa.2013.3418	15	0.075	MilliQ Water
Glycerol monolaurate (E-422)	56-81-5	OCC(O)CO	Intake via food addition	300	mg/day	Jian et al. 2018	300	1.5	MilliQ Water
Sodium citrates (E-331)	68-04-2	O.O.[Na+].[Na+].[Na+].OC(CC([O-])=O)(CC([O-])=O)C([O-])=O	Dietary Exposure	300	mg/day	https://www.accessdata.fda.gov/drugsatfda_docs/nda/2010/200535Orig1s000PharmR.pdf	300	1.5	MilliQ Water
Polysorbate 80 (E-433)	9005-65-6	CCCCCCCCC=CCCCCCCCC(=O)OCCOCC(C1C(CC(O1)OCCO)OCCO)OCCO	ADI	25	mg/kg/bw/day	https://doi.org/10.2903/j.efsa.2015.4152	1750	8.75	MilliQ Water
Carrageenan (E-407)	9000-07-1	[Zn++].CC([O-])=O.CC([O-])=O.[H][C@]1(C[C@@H]1NC(=O)NC1=NC=C(C=C1)C#N)C1=C(F)C=CC(C(=O)CC)=C1O	ADI	75	mg/kg/bw/day	https://doi.org/10.2903/j.efsa.2018.5238	5250	0.05	MilliQ Water
Carboxymethylcellulose (E-466)	9000-11-7	CC(O)=O.OCC(O)C(O)C(O)C(O)C=O	ADI	900	mg/kg/bw/day	https://doi.org/10.2903/j.efsa.2018.5047	63000	0.25	MilliQ Water
Amaranth (E-123)	915-67-3	[Na+].[Na+].[Na+].OC1=C(C=C2C=C(C=CC2=C1\N=N/C1=C2C=CC=CC2=C(C=C1)S([O-])(=O)=O)S([O-])(=O)=O)S([O-])(=O)=O	ADI	0.15	mg/kg/bw/day	https://doi.org/10.2903/j.efsa.2010.1649	10.5	0.0525	MilliQ Water
Acid Yellow 3 (E-104)	8004-92-0	C1=CC=C2C(=C1)C(=O)C(C2=O)C3=NC4=C(C=C(C=C4C=C3)S(=O)(=O)[O-])S(=O)(=O)[O-].[Na+].[Na+]	ADI	0.5	mg/kg/bw/day	https://doi.org/10.2903/j.efsa.2015.4070	35	0.175	MilliQ Water
Acid Violet 43	4430-18-6	[Na+].CC1=CC=C(NC2=CC=C(O)C3=C2C(=O)C2=CC=CC=C2C3=O)C(=C1)S([O-])(=O)=O	ADI	0.7	mg/kg/bw/day	https://www.cir-safety.org/sites/default/files/acid%20violet%2043.pdf	49	0.245	MilliQ Water
New Coccine, Ponceau 4R, SX Purple (E-124)	2611-82-7	[Na+].[Na+].[Na+].OC1=C(\N=N/C2=C3C=CC=CC3=C(C=C2)S([O-])(=O)=O)C2=C(C=C(C=C2C=C1)S([O-])(=O)=O)S([O-])(=O)=O	ADI	0.7	mg/kg/bw/day	https://doi.org/10.2903/j.efsa.2009.1328	49	0.245	MilliQ Water
Cochineal, Carminic acid (E-120)	1343-78-8	Cc4c3C(=O)c2c(c(O)c(O)c(C1OC(CO)C(O)C(O)C1O)c2O)C(=O)c3cc(O)c4C(O)=O	ADI	2.5	mg/kg/bw/day	https://doi.org/10.2903/j.efsa.2015.4288	175	0.875	MilliQ Water
Red 4 (E-125)	4548-53-2	[Na+].[Na+].CC1=CC(C)=C(C=C1N=NC1=CC(=C2C=CC=CC2=C1O)S([O-])(=O)=O)S([O-])(=O)=O	ADI	3.5	mg/kg/bw/day	Average concentration of dyes from this list	245	1.225	MilliQ Water
Sunset Yellow (E-110)	2783-94-0	[Na+].[Na+].[O-]S(=O)(=O)C1=CC=C(N\N=C2\C(=O)C=CC3=CC(=CC=C23)S([O-])(=O)=O)C=C1	ADI	4	mg/kg/bw/day	https://doi.org/10.2903/j.efsa.2014.3765	280	1.4	MilliQ Water
Acid Red 14, Azorubin (E-122)	3567-69-9	[Na+].[Na+].OC1=C(C=C(C2=C1C=CC=C2)S([O-])(=O)=O)N=NC1=C2C=CC=CC2=C(C=C1)S([O-])(=O)=O	ADI	4	mg/kg/bw/day	https://doi.org/10.2903/j.efsa.2009.1332	280	1.4	MilliQ Water
Acid Orange 7	633-96-5	[Na+].OC1=C(N=NC2=CC=C(C=C2)S([O-])(=O)=O)C2=CC=CC=C2C=C1	NOAEL	5	mg/kg/bw/day	https://www.ec.gc.ca/ese-ees/05BF983D-1A12-45B8-AFA7-27D8FB66F98C/FSAR_Azo-Pkg%203-Acid%20Dyes_EN.pdf	350	1.75	MilliQ Water
Blue 1 (E-133)	3844-45-9	[Na+].[Na+].CCN(CC1=CC(=CC=C1)S([O-])(=O)=O)C1=CC=C(C=C1)C(=C1C=CC(C=C1)=[N+](CC)CC1=CC(=CC=C1)S([O-])(=O)=O)C1=C(C=CC=C1)S([O-])(=O)=O	ADI	6	mg/kg/bw/day	https://doi.org/10.2903/j.efsa.2013.3288	420	2.1	MilliQ Water
Allura Red (E-129)	25956-17-6	COc1cc(c(C)cc1N\N=C/1C(=O)C=Cc2cc(ccc12)S(O)(=O)=O)S(O)(=O)=O	ADI	7	mg/kg/bw/day	https://doi.org/10.2903/j.efsa.2009.1327	490	2.45	MilliQ Water
Calcium propionate (E-282)	4075-81-4	[Ca++].CCC([O-])=O.CCC([O-])=O	ADI	21.1	mg/kg/bw/day	https://doi.org/10.2903/j.efsa.2014.3779	1477	2.45	MilliQ Water
Maltitol (E-965)	585-88-6	C(C1C(C(C(C(O1)OC(C(CO)O)C(C(CO)O)O)O)O)O)O	Consumption before symptoms	40000	mg/day	Saraiva et al. 2020	40000	0.5	MilliQ Water
Sorbitol (E-420)	50-70-4	C(C(C(C(C(CO)O)O)O)O)O	Dietary Exposure	50000	mg/day	https://www.accessdata.fda.gov/scripts/cdrh/cfdocs/cfCFR/CFRSearch.cfm?fr=184.1835	50000	1.379	MilliQ Water
Acesulfame K (E-950)	55589-62-3	CC1=CC(=O)NS(=O)(=O)O1	ADI	9	mg/kg/bw/day	https://doi.org/10.2903/j.efsa.2016.4437	630	3.15	MilliQ Water
Sucralose (E-955)	56038-13-2	OC[C@]2([H])O[C@]([H])(O[C@@]1(C[Cl])O[C@@]([H])(C[Cl])[C@]([H])(O)[C@@]1([H])O)[C@@]([H])(O)[C@]([H])(O)[C@@]2([H])[Cl]	ADI	15	mg/kg/bw/day	http://dx.doi.org/10.2903/j.efsa.2016.4361	1050	5.25	MilliQ Water
Riboflavin (E-101)	83-88-5	Cc1cc2c(cc1C)N(CC(O)C(O)C(O)CO)C1=NC(=O)NC(=O)C1=N2	ADI	0.5	mg/kg/bw/day	https://doi.org/10.2903/j.efsa.2013.3357	35	0.175	MilliQ Water
Isomalt (E-953)	64519-82-0	OCC(O)[C@]([H])(O)[C@]([H])(O)[C@]([H])(O)CO[C@]1([H])O[C@@]([H])(CO)[C@]([H])(O)[C@@]([H])(O)[C@@]1([H])O	Laxative Threshold	30000	mg/day	https://doi.org/10.2903/j.efsa.2013.3496	30000	0.5	MilliQ Water
Screening concentration stablished at 1 mg/mL due to low solubility
Sorbic acid (E-200)	110-44-1	C\C=C\C=C\C(O)=O	ADI	11	mg/kg/bw/day	http://dx.doi.org/10.2903/j.efsa.2019.5625	770	1	MeOH
Lecithin (E-322)	8002-43-5	CCCCCCCCC(=O)OC(COC(=O)CCCCCCCC=CCC=CCCCCC)COP(=O)(CC[N+](C)(C)C)[O-]	Dietary Exposure	118	mg/kg/bw/day	https://doi.org/10.2903/j.efsa.2017.4742	8260	1	MilliQ Water
Tartrazine (E-102)	1934-21-0	c1cc(ccc1\N=N\C1C(=NN(C1=O)c1ccc(cc1)S(=O)(=O)O)C(=O)O)S(=O)(=O)O	ADI	10	mg/kg/bw/day	https://doi.org/10.2903/j.efsa.2016.4613	700	1	MilliQ Water
Stevia (E-960)	57817-89-7	C[C@]12CCC[C@](C)([C@]1([H])CC[C@@]13CC(=C)[C@@](C1)(CC[C@@]23[H])O[C@@]1([H])O[C@@]([H])(CO)[C@]([H])(O)[C@@]([H])(O)[C@@]1([H])O[C@]1([H])O[C@]([H])(CO)[C@@]([H])(O)[C@]([H])(O)[C@]1([H])O)C(=O)O[C@@]1([H])O[C@@]([H])(CO)[C@]([H])(O)[C@@]([H])(O)[C@@]1([H])O	ADI	4	mg/kg/bw/day	https://doi.org/10.2903/j.efsa.2015.4316	280	1	MilliQ Water
Polydimethysiloxane (E-900)	63148-62-9	C[Si](C)(C)O[Si](C)(C)O[Si](C)(C)C	ADI	17	mg/kg/bw/day	https://doi.org/10.2903/j.efsa.2020.6107	1190	1	MilliQ Water
Methylcellulose (E-461)	9004-67-5	COCC1O[C@@H](O[C@@H]2C(COC)OC(OC)C(OC)C2OC)C(OC)C(OC)C1OC	Dietary Exposure	157	mg/kg/bw/day	https://doi.org/10.2903/j.efsa.2018.5047	10990	1	MilliQ Water
Aspartame (E-951)	22839-47-0	COC(=O)C(Cc1ccccc1)NC(=O)C(N)CC(O)=O	ADI	40	mg/kg/bw/day	EFSA	2800	1	MilliQ Water

## Sheet: __JChemStructureSheet
Hash	StructureStringLength	StructureStringFormat	StructureString
094526913BF97EA38AD49C30977C96E5	1	cxsmiles	JChemExcelMwAAAB+LCAAAAAAABABz9vfTcNaw9df0d9Z0NrR1dgYjQ2d/IMcPKAVkw8Q1nHM0QXwASBy0vTMAAAA=
6BCC635C5AB52ED8104B39EABD83FBBE	1	cxsmiles	JChemExcelIQAAAB+LCAAAAAAABABzznE2tHXWcM7RBBLKfpqobEPnHADnlHeeIQAAAA==
919D17F9726C55D5632C7EE6ECBECC77	1	cxsmiles	JChemExcelSwAAAB+LCAAAAAAABACL9teNjfbTjtWw9dd0NrR1dtawddZwztEE0YZ+QBE/Z5AAkAMWdNMEIjdNsI5ooFZNkDaoKAAPtrbnSwAAAA==
10439CC3BF8F3541F0CF830E641224FE	1	cxsmiles	JChemExcelNQAAAB+LCAAAAAAABAAlhrENADAIw96BMdmZvJdH+H8uVSXLNogmOKbO4oxWooIiGv9hcuMnMRe3NYhfNQAAAA==
9B117FEC81868403CE0A7FE51E60FD6A	1	cxsmiles	JChemExcelOQAAAB+LCAAAAAAABADzcza0ddZw1rD18zOEMHM0nUGUrbMhiKnhpglEbprOyn6awRq2/nARAG3rBxU5AAAA
48E58C499FE727527AB1A9D76E1C4B24	1	cxsmiles	JChemExcelLgAAAB+LCAAAAAAABABz9tNw1gzWsPXXBGE/Q2cNWz9nDeccTVtnQ2dDW2dnWyBPE0gaajor+wEAEzDhpi4AAAA=
8CB8E7BE0E51CAACB015671ADB829842	1	cxsmiles	JChemExcelOgAAAB+LCAAAAAAABABz9o/xs3XW0HfWsPXX9HfWdDa0dXYGI0NnmBRcUAMoqums4aYJRG4AIvcr4zoAAAA=
CE89BE5860F757E677544A8EAC37BF89	1	cxsmiles	JChemExcelIgAAAB+LCAAAAAAABABzczbUcNP0dzaydXYGIg1bZyN/Q01nQ1tnPyDf0FnZDwCXtgHaIgAAAA==
41327F770EBC8898D059C47E2A922328	1	cxsmiles	JChemExcelOAAAAB+LCAAAAAAABABz9o9xtnXWiHHWsPXX9HfWdDa0dXYGI0N/MFvD39kIJmTkrOynaevnbOtnCABoxhNUOAAAAA==
79E3A78791EB5789147D842E96D5F5F8	1	cxsmiles	JChemExcelLAAAAB+LCAAAAAAABABzdnb203B29nc2tHXWcM7RdIZThiBKw9Zf088QyPMDCgAAngT/DiwAAAA=
7CE73610FD45BAC288A2F3D9A8102332	1	cxsmiles	JChemExcelNwAAAB+LCAAAAAAABABzdjbU8HfWsPXX9NPwczaydXYGIyNNZ0OgGJAA8YAqkGVsnQ0BE71xUjcAAAA=
6A2BE63482B69C3D4905215A22EFE779	1	cxsmiles	JChemExcelIwAAAB+LCAAAAAAABABzdnb203B21nR2NnT2dzYCMp2B2EgTSGoCkbOmvyEAJ3YxxSMAAAA=
76C21182D1600993E04E6B2A664AE066	1	cxsmiles	JChemExcelKQAAAB+LCAAAAAAABAANyLEJAAAIxMB1tHz7r9LrIu5fKwQOAiCGoAv3VxmjRAb/3nzEHkec5pkpAAAA
6A7F6788700596624B01100F686F732E	1	cxsmiles	JChemExcelMAAAAB+LCAAAAAAABAAViLEJADAMw96xxxzgSdAxGfr/L01BCCQQbqGMGSrdQbeMjpfjfZCf63pCaUvoMAAAAA==
A22DBC76B839BB07A18CB75B52F300E7	1	cxsmiles	JChemExcelKQAAAB+LCAAAAAAABABzdgYDDWdNf2cNW39NZ39nQ1s/Zw03TVugYI6ms4YfkGXonAMAXDfQeSkAAAA=
21131B9FAAC6AE45BFE3666D72784AF8	1	cxsmiles	JChemExcelJAAAAB+LCAAAAAAABABzdvbTcHbWdNaw9QcSzpr+zoa2zs5AZAShbJ0NjQAeHDmvJAAAAA==
F1E19982ABEDC5D761EB3AD76BD0EA1A	1	cxsmiles	JChemExcelNAAAAB+LCAAAAAAABABz9nc2tHV2tnXWAGJDf2dNZw1bZ30g4a/pZ+js7O/sbKgZA1eSowlSBQBJg6PjNAAAAA==
A7050C7FA4FBD2687734A457BF713A99	1	cxsmiles	JChemExcelLQAAAB+LCAAAAAAABABzznE2tHV2tnXWAGJDTSgHxPZz1rD1hwn4AQWccwAhdqveLQAAAA==
DAA8CE67AD6B18AC49664DAB06DFF515	1	cxsmiles	JChemExcelKAAAAB+LCAAAAAAABABzdtZw1gQiZw1/EHY2tHV2tgWK5WgCKUNNP0NnWz8gMgQATpz5rCgAAAA=
DF07ADE23349011FF245F4925A5659F9	1	cxsmiles	JChemExcelIwAAAB+LCAAAAAAABABzdtZw1tTwc9aw9dd0NrR1BnJzNOGUoaazsjMALFMNniMAAAA=
18AD2ECE1A78E090F834C3C1C710B2E0	1	cxsmiles	JChemExcelFwAAAB+LCAAAAAAABADzdza0ddZwKtJ0BlJAbAhiKvsBAGNj8DIXAAAA
41A3CDCE3FD9F5E6BA0B9599AC4BC28F	1	cxsmiles	JChemExcelJAAAAB+LCAAAAAAABABzdvZ3NvR3NrJ1drZ11vAP1nDW1LD11wQiIN/I2RDIdwYAD0qFUyQAAAA=
BB4ABE4BBA16118B3A7245B965466119	1	cxsmiles	JChemExcelNAAAAB+LCAAAAAAABABzcza0dXY2snXWcLZ1NvQzdNaw9dd0NgbxgcBYEyjtr+kH5Cg7a0Lk/I0A6xfxDDQAAAA=
B33E89EE32B4C1037DB0215B002C2C93	1	cxsmiles	JChemExcelGwAAAB+LCAAAAAAABABzDnY2tPXzs3XWcNaw9df0M/TTBDI1gcgZABaVpwobAAAA
4828CFC7D836596430BA4F6B39335236	1	cxsmiles	JChemExcelIAAAAB+LCAAAAAAABABzdtZw1vQzdNaw9dd0NrJ1dgYjI79gQ5CIrT8AHLnmaSAAAAA=
847190FF2594750FB6DCA8B1C1E12719	1	cxsmiles	JChemExcelIgAAAB+LCAAAAAAABABz9rN11vBzdja0dQaxnHM0gw01/aL9tGM1ov11YzVt/QHFlutLIgAAAA==
CEC328D5D481BFB11F1FA1E18AB36708	1	cxsmiles	JChemExcelHwAAAB+LCAAAAAAABADzcza0ddZwztF01nDTtPVz1vB3BmJNWyByNnTOAQBhEBXfHwAAAA==
ED20B52335CD7123D9279C970AD6379A	1	cxsmiles	JChemExcelHQAAAB+LCAAAAAAABABz9tNwdja0dXa2ddZwztH0s3U21ASyNG39nJX9ABEJXCkdAAAA
E378AD89EB49303648E17AA235B446B7	1	cxsmiles	JChemExcelGAAAAB+LCAAAAAAABABzdja0dXbWcM7RBFK2zob+QI6/pq0/AIAkbc0YAAAA
6AF1AB5A1F5AC5F1723BC876CE2BE02E	1	cxsmiles	JChemExcelHAAAAB+LCAAAAAAABABzznE2tHV2tnXWcPYzcnYOdjay9XNW9tN0tvUzBADOfv89HAAAAA==
4B50F31D103605814293A2188B3A5620	1	cxsmiles	JChemExcelOAAAAB+LCAAAAAAABABzDtaw9dcEYWdDW2dnW2cNZzDHCEIBgRGI1rB1NtSM9tOO1Yj2143VtPUHALzu1Rs4AAAA
46688128D3082898D7DDBFEC36C09AE8	1	cxsmiles	JChemExcelIAAAAB+LCAAAAAAABADzcza0ddZwztF01rD11/TT8LN1NtQEiTmDkSEA7Ai9FiAAAAA=
30CD576DBAF7F6F1E91775BE37CD3353	1	cxsmiles	JChemExcelPgAAAB+LCAAAAAAABABz9nc2tHV21vB31rT1c9YAIlt/Tb9gEAnCzka2IEEQC6jK1tkIIq/hrAlSbwgAO75jMD4AAAA=
A7330A2A55DB1D875C61FE0FECB7C770	1	cxsmiles	JChemExcelNwAAAB+LCAAAAAAABABz9nc2tPVz1nDWBJFAZOuv6RcMIkHY2cjW2RmMjJydnTXcNIHIDajSEAD+5l8/NwAAAA==
7C1163ABC93AEFBCF643D885B4CFB343	1	cxsmiles	JChemExcelJQAAAB+LCAAAAAAABACL9teNjfbTjtWw9df0cza09XN29jN0BjKcnW2dNZxzNP1snQ0ByX2wxCUAAAA=
2D09C5F66D3FB7547CD759A778223716	1	cxsmiles	JChemExcelKQAAAB+LCAAAAAAABABz9jN09nf203B2NrJ19rN11nDO0Qw20oxxNrT1i4n2047ViPbXjdW09QcAD4hspCkAAAA=
522D8692A80F8FABFD15774E9BE73306	1	cxsmiles	JChemExcelJwAAAB+LCAAAAAAABABz9nfWsPXXdNZwdja0dXYGI0NNP6ign6azs4a/pq0/AEF1EL0nAAAA
94DB98037472062E06B558E4F3C81627	1	cxsmiles	JChemExcelUAAAAB+LCAAAAAAABADzd452dvCINfQHUxogKtZIw9k5RxMqAmICWWBJKMMIzEAS0IAKGDrnAABB1UqzUAAAAA==
4F2CB7AE811023A943EC4B0BBE8F92A9	1	cxsmiles	JChemExcelGgAAAB+LCAAAAAAABADzt3U29AvWsPXXBGFnI1tnZzAyNAIAmq2wZRoAAAA=
7FA7EED8EF252D19C1197FBA57943C4E	1	cxsmiles	JChemExcelRAAAAB+LCAAAAAAABABz9nfWsPXXjHZ28IjVcHY2tHV2BiNDTT8UCQ1/TSDPz9kZpkbD31kTLOpsCAClsM57RAAAAA==
0111ECBF0FD0330679AF956F65292A8E	1	cxsmiles	JChemExcelwAAAAB+LCAAAAAAABACVjbENADEIA9exS5I6UiQ36Rjgxf5rBEHx7X/lMwajR3uHDUlJARGpJ6x8JlPCEstARnRwYkx6k3mdQM4eoOBV+77I/OY/ii8jkxt5wAAAAA==
F099C6E4EC2F05FB172AB7C20DEA4AA7	1	cxsmiles	JChemExcelHgAAAB+LCAAAAAAABACL9taO1XN2NrR1dtaw9df0sw3WiPbXjdUEcfwNAa9mO/YeAAAA
98D127BD98283687C81BEDC906A07936	1	cxsmiles	JChemExcelSQAAAB+LCAAAAAAABADzd3bW8NeMdnZw8IiFMFBoZ38wyxBCaTjjUmroDwBP1dB0SQAAAA==
F39CAEE03C600072A1A31514425A5A23	1	cxsmiles	JChemExcelJwAAAB+LCAAAAAAABADzd3bW8NeEYmdDf2cNZzhXE8iH0P4AGQjmyicAAAA=
7D8946D19902BF25B7A768D5B7D0F670	1	cxsmiles	JChemExcelFAAAAB+LCAAAAAAABADzd3bW8NdEwf4A38NpUhQAAAA=
1561F5C14A72D8AA6E04278A9BFE360E	1	cxsmiles	JChemExcelNgAAAB+LCAAAAAAABABzdja0dXY2snXWcLZ1NnTW9NNwdtbw14RjIDK09XPWsPXXhJAgrhEAcG6cgDYAAAA=
4B21F0F1FBDEF09945CC579C1F0D3B37	1	cxsmiles	JChemExcelSgAAAB+LCAAAAAAABAAtirsVADAIAtfR0k9LxQDuv00kSQEcD8gAk4ZxFmi0ccgWe9ZEX62pVPRO8J3jxhxJCeq+SgAAAA==
F02B81139B33067646933ADE943B7C3A	1	cxsmiles	JChemExcelYAAAAB+LCAAAAAAABACL9kvUjtWLRib9dWOdNWz9NZ0Nbf38NKBMP1s/IN/Z2dZZA4gNNYM1QOo0QZIQpTikAAGfbX9gAAAA
BCB977E1C756248B39F54AEDD31E0CA8	1	cxsmiles	JChemExcelUwAAAB+LCAAAAAAABACL9kvUjtWLhpD+urHBGrb+miDsbGjr7GwExLbOGn62zkbOGrbOhprBGiBFYAVgNc5gpRBlziBVhrb+AD94kQVTAAAA
9965A190A42A1C21F9CF6D2F50ED3DC6	1	cxsmiles	JChemExcelVQAAAB+LCAAAAAAABACL9kvUjtWLBpPO/s6Gts7OGrbOGs6azrbOhn4xfkAyBijiD+I7G0FkQVJGmsEa0f66sZogOSBC4QEA2SqrhlUAAAA=
E180A5A0AFE3F784D2103486BD376718	1	cxsmiles	JChemExcelUAAAAB+LCAAAAAAABACL9kvUjtWLhpD+urHBGrb+miDsbGjr7GzrrOEX42frbBTjDBYDChkDsQZYyshYM1gDpAesHiJtCACk2XpwUAAAAA==
7ED2BAC23557A207BBF5440B49C6E009	1	cxsmiles	JChemExcelHgAAAB+LCAAAAAAABACLdk7U1o7Vc3Z21oj2143VtPVHZgMA4Ns3oh4AAAA=
23D4F24961FD54211DF3205E4173F569	1	cxsmiles	JChemExcelEAAAAB+LCAAAAAAABABzjnG2dYZgDX9NW38ARNE8gRAAAAA=
A1F4C965D9B135479292EA84CBC2D564	1	cxsmiles	JChemExcelFgAAAB+LCAAAAAAABADzd3bW8Nd0NvQHUbYQtq0/AAZDtpwWAAAA
A244A94DA128EFFFAF49168B1A1994AA	1	cxsmiles	JChemExcelGgAAAB+LCAAAAAAABABz9nc2tHV2tnXW8Nd01rB1NgSSzppA5AwA6w41PhoAAAA=
A22A6919573B1FA01A9D80D206DA41CD	1	cxsmiles	JChemExcelIwAAAB+LCAAAAAAABABzdja0dXbWsHXW8NcEUYZA0lkTiJzhDABSqP7tIwAAAA==
D7932606C0C1B6B5193CBB1BDCE1F9F1	1	cxsmiles	JChemExcelGgAAAB+LCAAAAAAABADzd9aw9dd0dtbw19QAkyAemAIAUMeHbxoAAAA=
6629418F8EDC677F8DED8A686BDDEB8B	1	cxsmiles	JChemExcelFAAAAB+LCAAAAAAABADzd9Zw1vDXBGFbGAUAWvEz6BQAAAA=
30B1554B0906E6A1AEE22CA2069939BA	1	cxsmiles	JChemExcelIgAAAB+LCAAAAAAABABzjg7OjNVw1gQif6xMZwA7TeNsIgAAAA==
DC1D9B2FFBEE96C2741A45D6251E56B2	1	cxsmiles	JChemExcelLQAAAB+LCAAAAAAABABzjvbTjtVw1gQiZ2f/AI1of91YTQ1bf01/Z2cNZ39nDS1NMAdMAwAVbSEiLQAAAA==
E54E5AD5037A67D58D6EF93D8CFDF63C	1	cxsmiles	JChemExcelHQAAAB+LCAAAAAAABABzdtbw17T11/N3BjFQsK0/AImNn0wdAAAA
7DC93170F5E8B10E270F3070E7EABF43	1	cxsmiles	JChemExcelNgAAAB+LCAAAAAAABABzdoaAGGdbIIYCDVt/TX9nZyDSAFGazob+zhrOINIZIgEAzeoHhTYAAAA=
79272366712F5A4ED4A1C91AC0F4EE56	1	cxsmiles	JChemExcelCAAAAB+LCAAAAAAABADzd3bW8Nd09gcACAndUQgAAAA=
E50A795FEF76A4BFEC26CC69CD988BB5	1	cxsmiles	JChemExcelOQAAAB+LCAAAAAAABABz9nd2NvSPdnZw8IjVgNJGzhrO/s6a/s4aQBJCGMFZYMLQ3xkAFbDWgTkAAAA=
4671B25A73380C670494AD51664D669C	1	cxsmiles	JChemExcelXgAAAB+LCAAAAAAABABNirEJwEAMA4dJY/Ek4AEMD4Lwld3HeIXfv4zTpRCSTspnj1EXKRlnweIfc1Vylgrb5ip1igWcak6jtBQ8HA0oN7o3/C4keosXBbGE+14AAAA=
0135ED34DCCA67482AEB1E93FD03989D	1	cxsmiles	JChemExcelNQAAAB+LCAAAAAAABACL9kvUjtWLRiL9nTWcnTWi/XVjNW39NZHZcBYApwUF7zUAAAA=
5569479A4D429FFE2BA9EBFD96BAD1B8	1	cxsmiles	JChemExcelbwAAAB+LCAAAAAAABACL9kvUjtWLRib9dWODNWz9NUHY2dDW2dnI1lkjxlnD1i/Gz9kYyAdynU3ANBAZm2gGa4D0gNWDtID12TobgVjOhqiyAAuNayNvAAAA
0BD77C0E0019E91852AA8E858B393EF6	1	cxsmiles	JChemExcelUgAAAB+LCAAAAAAABACL9kvUjtWLBpPOzoa2zs4azpq2QMLW2dAvxg9I6juDuEZAGTAyAiry1wzWiPbXjdXUADLReQDQJV6qUgAAAA==
CE08A4DF0CD9F8E4E6EF0C30B80AD275	1	cxsmiles	JChemExcelOQAAAB+LCAAAAAAABACL9kvUjtXzdza0dXa2dTZyBlPORrbOhjF+tn4xUHENIDbUDNaI9teN1dSw9de09QcAvIeVhDkAAAA=
652355850D1FA137763A9B7877D8D3AB	1	cxsmiles	JChemExcelhAAAAB+LCAAAAAAABACL9kvUjtWLBpPOzn4azs6Gts7OQKRh62yoGawR7a8bq6lh668JRFApDWeQVLSzdqwGighIsyYR+kGKUSQAORweVoQAAAA=
81B9C3315F658AA57BC7815043A84B25	1	cxsmiles	JChemExcelRwAAAB+LCAAAAAAABACL9kvUjtVzdja0dXa2ddbwczaCMPw1nY1tnY2cNWyBLIiYM4hvDOJr2DobagZrRPvrxmqCFNj6AwB2hPjURwAAAA==
708B1FD5F776CDB6541008F7EECC8886	1	cxsmiles	JChemExcelbQAAAB+LCAAAAAAABACL9kvUjtWLRib9dWODNWz9NUHY2dDW2dnW2chZw9bZUBPI0nAGCcc4G9n6xfhBZTWAPBANRIZGmsEaIBPAuoEIhQcAdFUtrm0AAAA=
628EC50B1ACF1F626911A2D47EBEC545	1	cxsmiles	JChemExcelVgAAAB+LCAAAAAAABACL9kvUjtWLhpD+urHBGrb+miDsbGjr7GzrrOEX42frbKQPYjobg4WAyNjZCKgkWAOkA6wapMEIJmtoBADDFVjIVgAAAA==
7CACE73D939282000C4DE61472107E1E	1	cxsmiles	JChemExcelIQAAAB+LCAAAAAAABABz9tNw1nTWsPXX9Hc2tPUDsoDYWdPW2dBZEywFAJir1gIhAAAA
3944584B38E62FB08BF9E002F3A16150	1	cxsmiles	JChemExcelHgAAAB+LCAAAAAAABADzt3U29HM2snXWcHZ2NtJ01rD11/QzdDZ0BgFDAAbsyzMeAAAA
572833D574EE9A568713CD14D4A8A316	1	cxsmiles	JChemExcelNAAAAB+LCAAAAAAABABz9nc2tHV2tnXWAGJDf2dNZw1b5xgg4a/pZ+js7O/sbKgZA1eSowlSBQCJE2EWNAAAAA==
