# Supplementary material for: High-throughput screening of the effects of 90 xenobiotics on the simplified human gut microbiota model (SIHUMIx): a metaproteomic and metabolomic study
Source: Front Microbiol. 2024 Feb 20;15:1349367. doi: 10.3389/fmicb.2024.1349367 (PMC10912515; doi:10.3389/fmicb.2024.1349367)
Supplement: Supplementary file 7 [file Table_7.XLSX]

## Sheet: Sheet1
Table S7: Relative abundance (%) of the species of SIHUMIx after exposure to plant protection products and food additives and dyes: Treatments that caused a significant change in SIHUMIx's structure are shown in the followin table, each column from each species represents a replicate. In parenthesis the solvent control of each plate
Plant protection products
	Anaerostipes caccae			Bacteroides thetaiotaomicron			Bifidobacterium longum			Blautia producta			Clostridium butyricum			Erysipelatoclostridium ramosum			Escherichia coli			Lactobacillus plantarum			Heterogeneous
Plate 1
Control (DMSO)	2.47339	2.4472	2.37648	63.099	61.7563	60.2815	1.34203	1.29649	1.72113	6.46362	6.36118	6.03504	9.16732	9.36672	8.91418	3.46167	3.54349	3.88332	3.26672	3.62457	3.94055	6.25475	7.05542	8.4642	4.47151	4.54864	4.3836
Aclonifen	2.45085	2.45401	2.51966	59.5045	59.1053	60.0318	2.1227	1.90855	2.46758	6.67999	6.65806	7.14055	8.22625	8.54242	7.22469	4.31305	4.31879	4.34046	4.05083	3.92688	3.85289	8.01117	8.27411	7.76384	4.64065	4.81186	4.65857
Azoxystrobin	2.40324	2.38517	2.45425	59.1094	56.4341	60.9981	1.57334	1.78033	1.29013	6.26983	6.41876	6.84049	7.83812	8.03544	8.70709	3.91216	4.46442	3.30744	4.5111	4.82329	3.79247	9.78012	10.8692	8.02595	4.60266	4.78931	4.58407
Boscalid	2.21329	2.32992	2.25104	59.7453	60.9146	58.5818	1.37414	1.6092	1.9976	6.44359	6.16369	6.32901	8.81955	8.32423	8.24793	3.70245	3.88344	4.17244	4.10518	3.76057	4.14575	9.27935	8.52432	10.1313	4.31718	4.49001	4.14314
Plate 2
Control (DMSO)	2.62805	2.64029	2.70161	58.8718	57.9339	60.2008	1.21898	1.16017	1.00754	6.39379	6.45998	6.58185	8.34844	8.84029	8.90408	3.75024	3.75112	3.54641	4.56103	4.48601	4.21849	9.96126	10.6184	8.6182	4.26645	4.10982	4.22098
Chloridazon	2.88745	2.81469	2.88012	54.3353	53.5734	55.1498	1.27394	1.34252	1.0537	7.6243	7.56305	7.54499	9.46615	9.50393	9.55265	4.34735	4.52494	3.99407	6.91465	7.10854	6.16008	8.59507	8.92887	9.22597	4.55577	4.6401	4.43859
Cyazofamid	2.45022	2.86845	2.54347	57.5573	51.0795	56.9953	1.09406	1.37074	1.04198	6.74869	8.01962	6.89245	9.21726	12.1335	9.91049	4.00132	5.02475	4.05299	4.83982	5.3837	4.77211	9.24907	9.16126	8.95167	4.84227	4.95848	4.83954
Difeconazole	2.75304	2.59895	2.69197	58.6056	59.2215	59.6604	1.1427	1.14715	1.05082	6.99905	6.59951	6.46074	8.89302	8.50683	8.80355	4.07709	3.93332	3.88129	4.21249	4.32486	4.15261	8.65362	9.06963	8.63741	4.66336	4.59828	4.6612
Plate 3
Control (DMSO)	3.08757	3.41369	2.99208	60.5295	55.8367	62.1033	1.30397	1.34711	1.36745	6.66309	7.68367	6.43435	9.58424	11.5821	8.80887	2.93512	3.33541	2.74061	4.71727	5.24072	4.61335	6.30827	6.19491	6.37158	4.87102	5.36566	4.56837
Epoxiconazol	3.00763	3.09972	2.76125	61.7767	62.4235	61.4498	1.20236	1.29198	1.24099	6.8066	6.61521	6.52847	10.1694	9.82104	9.41355	2.76124	2.71955	2.84387	4.24171	3.97898	3.97366	5.09384	5.17455	6.99482	4.94046	4.87552	4.79356
Plate 4
Control (DMSO)	2.87716	2.92889	2.81388	61.2199	62.1808	59.8346	0.712289	0.687028	0.565257	6.77492	6.84273	6.74503	9.23272	9.07984	10.8329	3.23703	3.18413	3.55875	4.26672	4.07267	4.37685	6.98813	6.38223	6.54487	4.69117	4.64166	4.72787
Fluroxypyr	3.24684	3.24232	3.25066	59.0189	59.6267	60.8221	0.794462	0.80319	0.7955	7.90644	7.80633	7.71163	7.31587	7.13704	6.96457	3.13873	3.49315	3.26406	3.91861	4.12841	3.99343	9.7105	8.93357	8.33679	4.94969	4.82925	4.86129
Imidacloprid	3.07063	3.02585	2.79919	64.273	64.4624	62.2436	0.594383	0.613387	0.453274	7.15955	6.89969	6.73406	9.00833	8.99774	10.6646	2.84687	2.96066	2.92306	3.39299	3.40487	3.35008	4.84918	5.11082	6.26927	4.80505	4.52461	4.56288
Foramsulfuron	3.04879	3.12282	3.12283	64.7245	63.1599	63.1599	0.522766	0.448339	0.44834	7.10421	7.04955	7.04955	9.06044	10.2189	10.2188	2.76415	2.74489	2.74489	3.29052	3.49969	3.4997	4.94604	4.92508	4.92509	4.53861	4.83082	4.83082
Plate 5
Control (DMSO)	2.32162	2.39604	2.33624	60.1939	62.2918	63.8609	1.22111	1.06759	1.06419	6.41214	6.47988	6.53734	10.8997	11.0261	9.99295	3.21684	2.72966	2.70922	3.71321	3.15992	3.05893	7.82807	6.61274	6.12877	4.1934	4.2363	4.31142
Napropamide	2.47782	2.49552	2.33526	54.873	56.2789	54.0626	1.04635	1.11376	1.01	6.7394	6.95626	6.46786	10.7996	9.69782	11.225	2.88974	2.77008	3.17862	4.18814	4.35916	4.53133	12.4836	11.7707	12.6798	4.50244	4.55785	4.50956
Plate 6
Control (DMSO)	2.23224	2.23954	2.23498	61.5719	59.6153	60.8721	0.583243	0.53048	0.529462	6.64506	6.46837	6.57993	10.3995	11.1961	10.9409	3.22641	3.5542	3.38081	4.46728	4.97742	4.569	6.45248	6.94745	6.4466	4.42187	4.47111	4.44617
Prosulfuron	2.14708	2.11682	2.1442	62.1189	61.5839	61.1783	0.569916	0.517298	0.476852	6.55048	6.3297	6.51063	9.89157	10.898	11.2876	3.36426	3.27068	3.21985	4.45058	4.42254	4.49358	6.532	6.41862	6.21686	4.37525	4.44241	4.47219
Plate 8
Control (ACN)	1.67074	1.8545	1.95667	64.121	64.4919	60.983	1.22757	1.14523	1.28852	6.59013	6.32322	6.40834	4.93667	4.65801	5.73822	2.23481	2.33677	2.47896	8.53607	8.39856	9.58288	5.40132	5.62218	6.08957	5.28171	5.16962	5.47388
Flufenacet thiadone	1.98438	1.95387	1.80297	66.4317	66.7465	66.5085	1.18163	1.25607	1.15758	6.7757	6.465	6.19069	4.66864	4.39464	4.35356	1.93649	1.86499	1.82636	7.92521	8.10042	7.60487	3.75108	4.14132	4.82764	5.34521	5.07714	5.72783
Plate 9
Control (MeOH)	1.97781	2.04535	1.97855	67.3686	67.4144	66.8453	0.463849	0.437016	0.463193	6.44103	6.4863	6.58592	10.7603	10.2802	11.0238	2.79348	2.74045	2.7965	2.80135	3.12964	2.79657	2.94099	3.30222	3.17259	4.45259	4.16451	4.33758
Ethoxyquin	2.09751	1.94587	1.90835	64.1837	66.8946	64.4847	0.841905	0.663905	0.832705	6.94137	6.73638	6.9249	10.3596	10.6213	10.5239	3.75487	2.9861	3.52873	3.48488	2.83659	3.25883	4.11534	3.25293	4.27667	4.22088	4.06235	4.26121
Food additives and dyes
	Anaerostipes caccae			Bacteroides thetaiotaomicron			Bifidobacterium longum			Blautia producta			Clostridium butyricum			Erysipelatoclostridium ramosum			Escherichia coli			Lactobacillus plantarum			Heterogeneous
Plate 9
Control (MeOH)	2.18934	2.25252	2.16715	66.8621	66.492	66.1428	0.353568	0.395974	0.339443	5.72316	5.87257	5.77657	10.1879	9.57522	10.5429	2.87544	2.82687	2.83785	4.7494	5.41641	4.91397	3.04978	3.31651	3.16949	4.00931	3.85195	4.10979
Butylated hydroxytoluene (BHT)	2.04424	2.18571	2.13569	58.7776	65.7888	64.5613	0.621421	0.391445	0.461254	6.5219	7.5248	7.28259	9.61621	10.0569	10.5346	4.26872	2.63336	2.60542	7.71108	4.90763	5.69627	5.62139	1.83666	1.97431	4.81746	4.67471	4.74857
Butylated hydroxyanisole (BHA)	1.96504	2.08287	1.93384	61.3533	61.6363	58.0831	0.720551	0.520264	0.856162	6.79496	6.84527	6.71528	9.28994	9.2195	9.37673	2.79093	2.92123	3.40048	7.38346	6.16613	7.91655	5.07641	5.88028	6.95915	4.6254	4.72816	4.75876
Sorbic acid	2.17324	2.41883	2.26654	58.9229	61.0605	58.691	1.91739	1.68076	1.7019	7.186	7.76387	7.03368	7.49111	6.70275	8.00891	3.96163	3.88502	4.02	8.02411	6.88633	7.97125	5.72853	5.00538	5.24907	4.59509	4.59658	5.05765
Saccharin	1.50398	1.89348	1.55906	36.5931	37.8868	38.2916	0.36521	0.452187	0.442115	9.35843	9.90731	8.897	2.67719	4.8705	3.43565	2.16623	1.59764	1.87142	40.8475	33.94	38.0198	1.61658	5.34487	2.63317	4.87183	4.10724	4.85013
Plate 10
Control (H2O)	1.94308	1.95739	1.89594	55.93	55.6929	56.209	0.461005	0.401043	0.471569	6.2908	6.35093	6.14934	14.8286	14.1788	13.4047	4.46415	4.32763	4.88388	5.38495	5.81183	5.51303	5.6433	6.28183	6.53201	5.05409	4.99762	4.94057
Tartaric acid	2.60987	2.55978	2.68511	46.9079	49.0389	48.5187	0.55342	0.488758	0.487999	8.61322	8.27087	8.11838	15.3374	14.8255	16.0519	2.36594	3.07055	2.67116	6.92053	6.74888	7.13973	11.0518	9.36358	8.77476	5.63986	5.63314	5.55225
Ascorbic acid	3.09925	3.34601	3.12902	58.6768	64.6611	64.8458	0.442323	0.441282	0.451732	9.46299	10.3053	9.5824	6.55602	5.05848	6.05816	3.2623	2.04364	2.08428	7.18907	5.41108	5.57029	6.56162	3.61542	3.53658	4.74959	5.11761	4.74169
Polysorbate 80	1.81786	1.86982	1.83689	62.2173	62.2779	63.1066	0.291496	0.358508	0.33792	5.99592	6.04917	5.81125	6.92152	7.17529	7.44288	4.24951	4.35328	3.9735	7.74119	7.36527	7.08095	5.39648	5.26103	5.09333	5.36876	5.28974	5.31668
Plate 11
Control (H2O)	1.75727	1.79113	1.8545	55.5444	55.5409	57.005	0.293263	0.332424	0.344621	5.50745	5.52295	5.37096	16.1478	15.2085	14.7249	3.6765	3.90894	3.60923	5.72866	5.90018	5.60531	4.78785	5.2034	4.94978	6.55678	6.59154	6.53575
Acid Yellow 3	1.91898	1.72214	1.8317	57.733	58.6889	57.9671	0.482325	0.343104	0.429259	5.60637	5.30216	5.57878	11.6824	12.2028	12.4397	4.0548	4.00579	3.86768	6.50307	6.04295	6.45953	5.68181	5.63515	5.2542	6.33722	6.05694	6.17207
Plate 12
Control (H2O)	2.00754	2.04225	2.05804	55.1253	53.2598	55.3188	0.406512	0.346856	0.379288	5.33651	5.3855	4.99633	14.9536	16.4522	15.4429	4.26684	4.72328	4.31787	6.65007	6.5624	6.51665	5.86233	5.94011	5.9074	5.39137	5.28765	5.06277
Acid Orange 7	2.61876	2.66017	2.64373	60.6122	60.6829	60.7323	0.568498	0.578113	0.565769	5.86036	5.82867	5.9359	4.37228	4.55665	4.42787	4.83602	4.75781	4.87996	10.4567	9.99963	10.2029	5.35797	5.78256	5.3656	5.31722	5.15345	5.24601
Blue 1	1.8709	2.01259	2.05113	62.5103	61.1772	61.1025	0.356335	0.403396	0.310506	4.68247	4.83232	5.06596	9.06971	10.0109	9.85714	4.16926	3.93679	4.28274	6.78722	7.36487	7.19402	5.46698	4.65311	4.9019	5.0868	5.60882	5.23414
Acid Red 14	2.10828	2.17366	2.22357	56.5795	55.8314	56.917	0.681729	0.794998	0.790342	4.91819	4.93604	5.05039	15.2381	15.0765	14.328	3.7787	3.85027	3.61768	7.19457	7.57078	7.7371	4.40346	4.55556	4.0372	5.09746	5.21075	5.29877
Allura Red	2.14493	2.11797	2.12143	60.664	59.5812	58.967	0.335162	0.336806	0.401752	4.92768	5.0668	4.96234	9.66959	9.89783	9.78467	4.41901	4.57604	4.41908	6.79325	7.15208	7.56234	5.83088	6.10821	6.19411	5.21549	5.16305	5.58725
Plate 13
Control (H2O)	2.406	2.24009	2.47675	54.5733	54.8634	54.8396	0.775957	0.773802	0.770394	7.432	7.01864	7.5301	13.1867	12.792	12.1076	4.55168	4.75314	4.49534	5.98295	5.66146	5.98163	7.04972	7.09176	8.11156	4.04166	4.80573	3.68706
Stevia	2.27982	2.24733	2.20865	57.7861	55.9294	58.7682	0.885573	0.811212	0.677582	6.29018	6.12981	6.07188	9.71224	11.2813	11.0554	4.46756	4.98267	3.91677	6.48673	6.20055	5.77926	6.46221	6.47888	6.0321	5.6296	5.93883	5.4902
Calcium propionate	2.06982	2.11802	2.0562	54.9904	56.2426	56.3384	0.73736	0.710621	0.660108	5.85839	5.9211	5.69953	13.7285	13.1256	13.0573	4.20087	3.88773	4.24345	6.1893	5.8801	5.86182	6.77182	6.7899	6.54064	5.45348	5.3243	5.54259
Sucralose	2.18465	2.06718	2.10668	57.2366	59.2841	57.4634	0.788763	0.673281	0.721897	6.24013	6.02202	6.14426	9.98216	9.66075	10.2805	4.79661	4.35021	4.6734	6.07375	5.92438	6.26877	7.37875	6.53416	6.76226	5.31861	5.48394	5.57878
Plate 14
Control (H2O)	1.81011	1.73433	1.85025	53.546	55.1593	55.1788	0.591551	0.513682	0.537542	7.73794	7.19015	7.52139	15.1912	13.7555	14.6577	4.63952	4.7745	4.44492	5.99748	6.08639	5.6136	7.14286	7.33594	7.14319	3.34337	3.45024	3.05259
Riboflavin	1.75368	1.71761	1.85207	53.8353	51.0411	55.9353	0.677448	0.605151	0.67486	5.60655	5.17094	6.11491	17.5141	20.2728	15.6917	3.78249	3.67584	3.4276	6.0648	6.53556	5.51968	4.64691	5.00266	5.31485	6.11872	5.9783	5.46908
Aspartame	1.7955	1.74227	1.82459	55.8304	55.5953	53.7083	0.718028	0.722258	0.690239	5.83943	5.72801	5.96021	15.0101	15.8697	17.5045	3.47835	3.55108	3.56851	5.99465	5.85725	5.68001	5.39788	5.02692	5.23323	5.93559	5.90719	5.83047
